# Supplementary figures and images for: Three-dimensional depth profiling of prostate tissue by micro ATR-FTIR spectroscopic imaging with variable angles of incidence
Source: Royal Society of Chemistry journal article supplement (doi:10.1039/c8an01929k), 2019-01-01

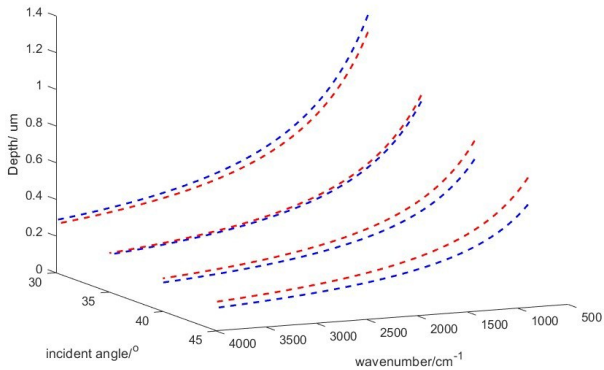

Supplement: c8an01929k1.pdf [file c8an01929k1.pdf]

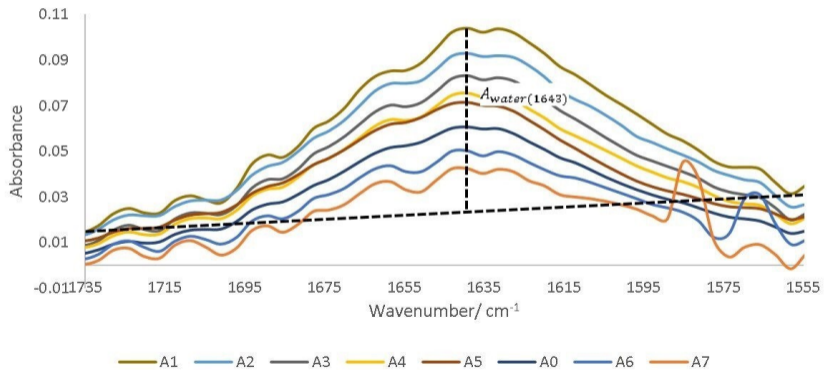

Supplement: c8an01929k11.pdf [file c8an01929k11.pdf]

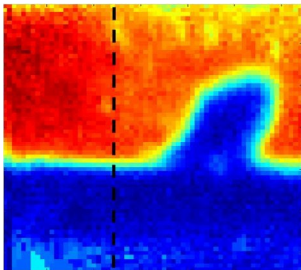

Supplement: c8an01929k12.pdf [file c8an01929k12.pdf]

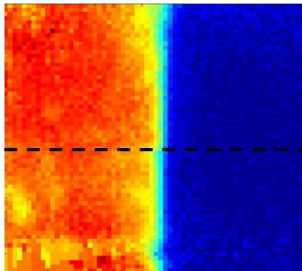

Supplement: c8an01929k13.pdf [file c8an01929k13.pdf]

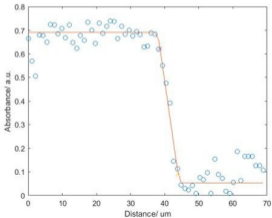

Supplement: c8an01929k14.pdf [file c8an01929k14.pdf]

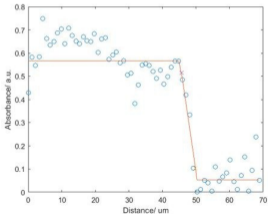

Supplement: c8an01929k15.pdf [file c8an01929k15.pdf]

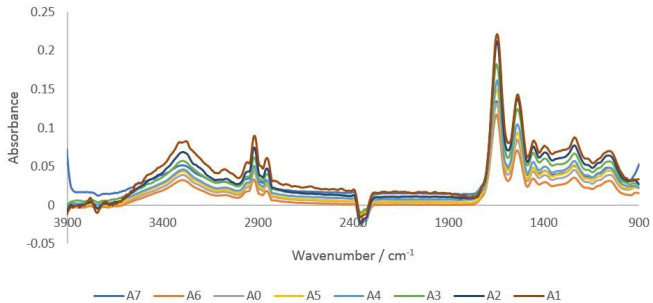

Supplement: c8an01929k4.pdf [file c8an01929k4.pdf]

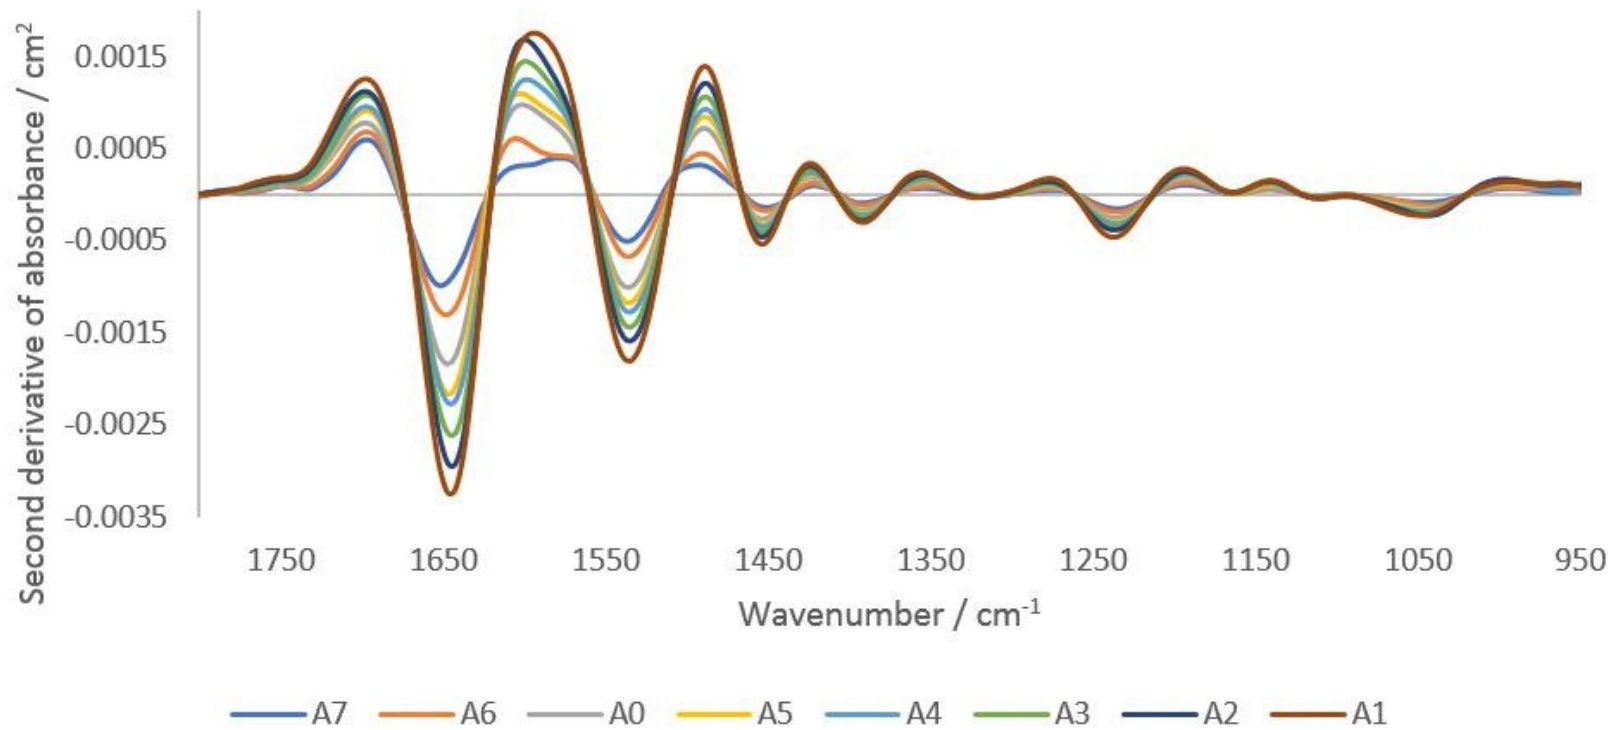

Supplement: c8an01929k5.pdf [file c8an01929k5.pdf]

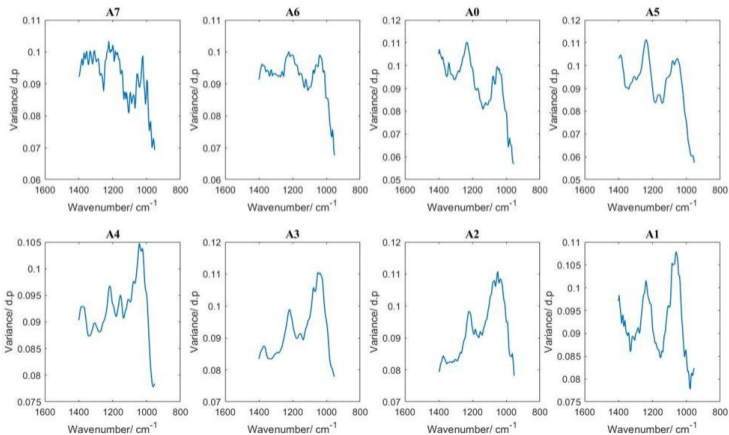

Supplement: c8an01929k7.pdf [file c8an01929k7.pdf]

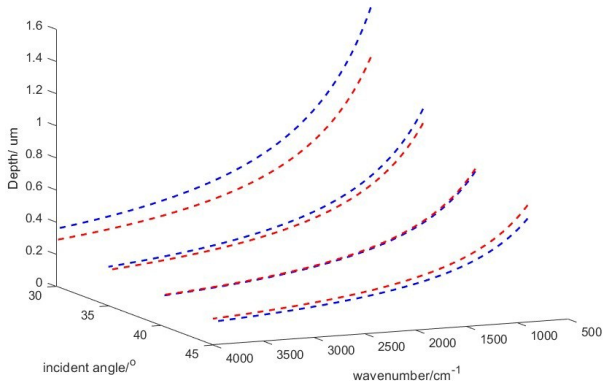

Supplement: c8an01929k8.pdf [file c8an01929k8.pdf]

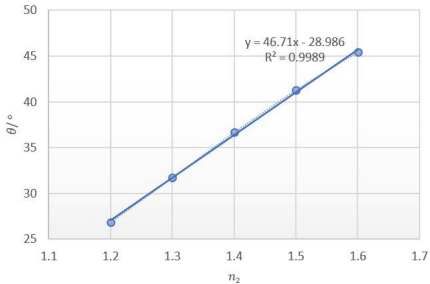

Supplement: c8an01929k9.pdf [file c8an01929k9.pdf]
